# Supplementary material for: Chemistry of cysteine assembly on Au(100): electrochemistry, in situ STM and molecular modeling
Source: Royal Society of Chemistry journal article supplement (doi:10.1039/c9nr02477h), 2019-01-01
Supplement: c9nr02477h1.pdf [file c9nr02477h1.pdf]

## SUPPORTING INFORMATION

### Chemistry of Cysteine Assembly on Au(100): Electrochemistry, in situ STM and Molecular Modeling

Christian Engelbrekt<sup>1</sup>, Renat R. Nazmutdinov<sup>2</sup>, Tamara Zinkicheva,<sup>2</sup> Dmitrii Glukhov<sup>2</sup>, Jiawei Yan<sup>3</sup>, Bingwei Mao<sup>3</sup>, Jens Ulstrup<sup>1, 2</sup>, Jingdong Zhang<sup>1\*</sup>

1. Department of Chemistry, Building 207, Technical University of Denmark, 2800 Kgs. Lyngby, Denmark.

2. Kazan National Research Technological University, K. Marx Str. 68, 420015 Kazan, Republic of Tatarstan, Russian Federation.

3. State Key Laboratory of Physical Chemistry of Solid Surfaces and College of Chemistry and Chemical Engineering, Xiamen University. Xiamen 361005, Fujian, China.

*Cysteine monolayers on Au(100), adsorption dynamics, network assembling, electrochemical interface, DFT*

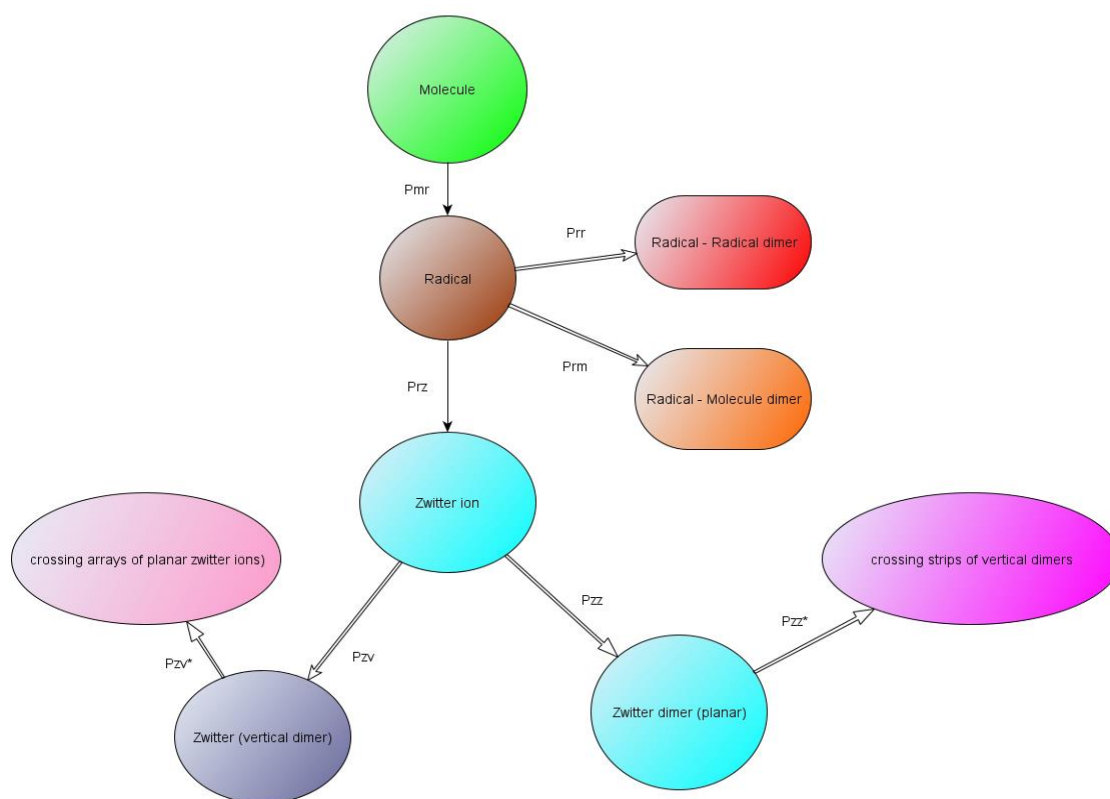

**Figure S1.** A tree of probabilities used in the kinetic MC simulations (Values for Au(100):  $P_{mr} = 0.125$ ,  $P_{rz} = 0.711$ ,  $P_{rr} = 0.638$ ,  $P_{zz} = 0.113$ ,  $P_{zv} = 0.004$ ,  $P_{zv}^* = 0.2$ ,  $P_{zz}^* = 0.02$ ).

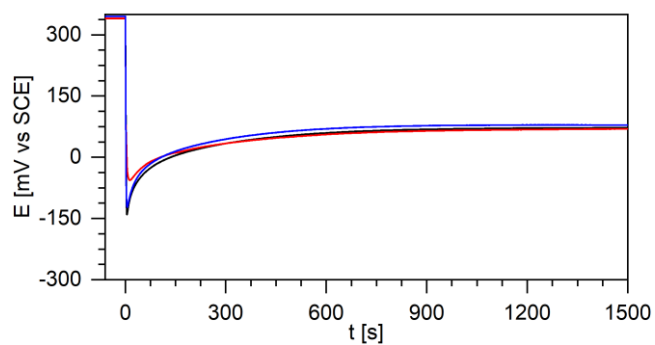

**Figure S2.** Reproducibility of chronopotentiometric data. Repeat measurements on different single-crystal Au(100) electrodes with 250  $\mu\text{M}$  L-Cys injected in 0.25 mM  $\text{KH}_2\text{PO}_4$  (pH4.66) at  $t=0$ .

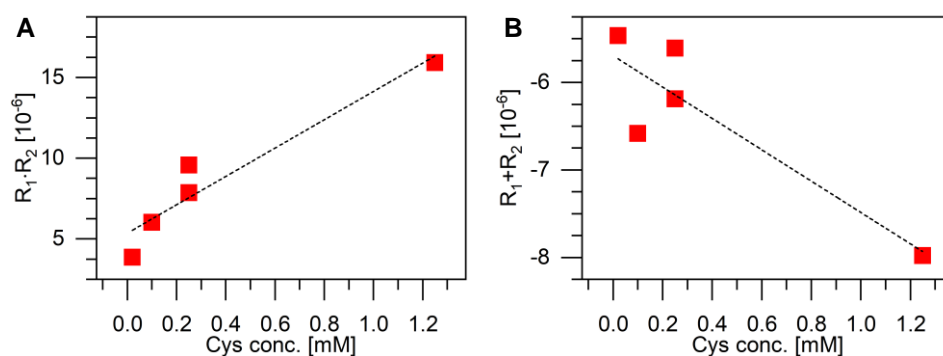

**Figure S3.** Plots of  $R_1 \times R_2$  (left) and  $R_1+R_2$  (right), from the chronopotentiometric data shown in Figure 3, against the Cys concentration (mM) in solution. 25 mM  $\text{KH}_2\text{PO}_4$ .

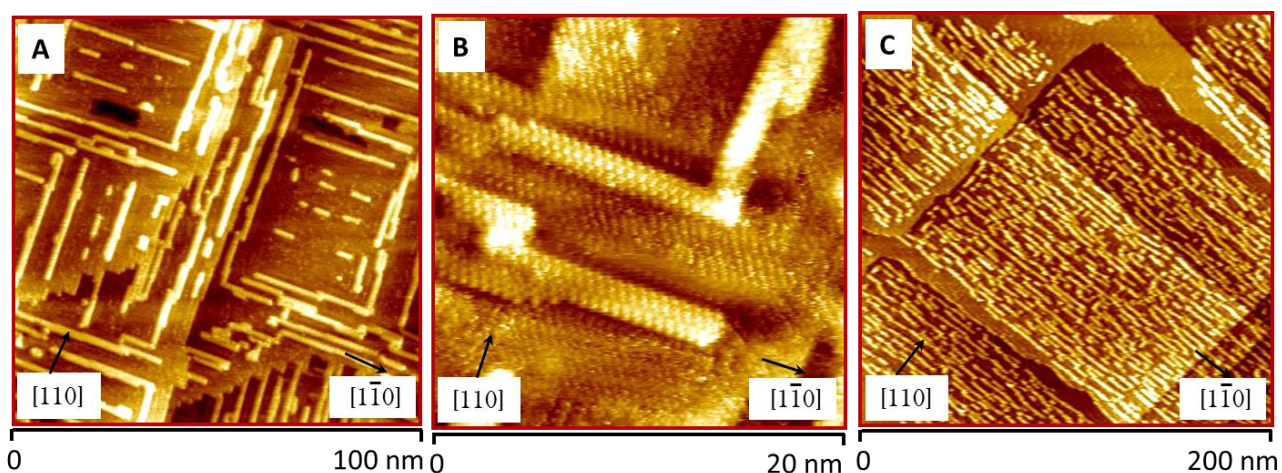

**Figure S4.** *In situ* STM images of L-Cys adlayer on Au(100),  $I_t=0.20$  nA,  $V_{\text{bias}} = -0.10 - -0.24$  V.  $E_w = -0.5 - -0.20$  V. (A) and (B) *in situ* adsorption for 60  $\mu\text{M}$  L-Cys in 20 mM  $\text{KH}_2\text{PO}_4$  (pH4.6). 3.5 hours (C) pre-adsorption of 0.5 mM L-Cys on Au(100) for 20 hours.

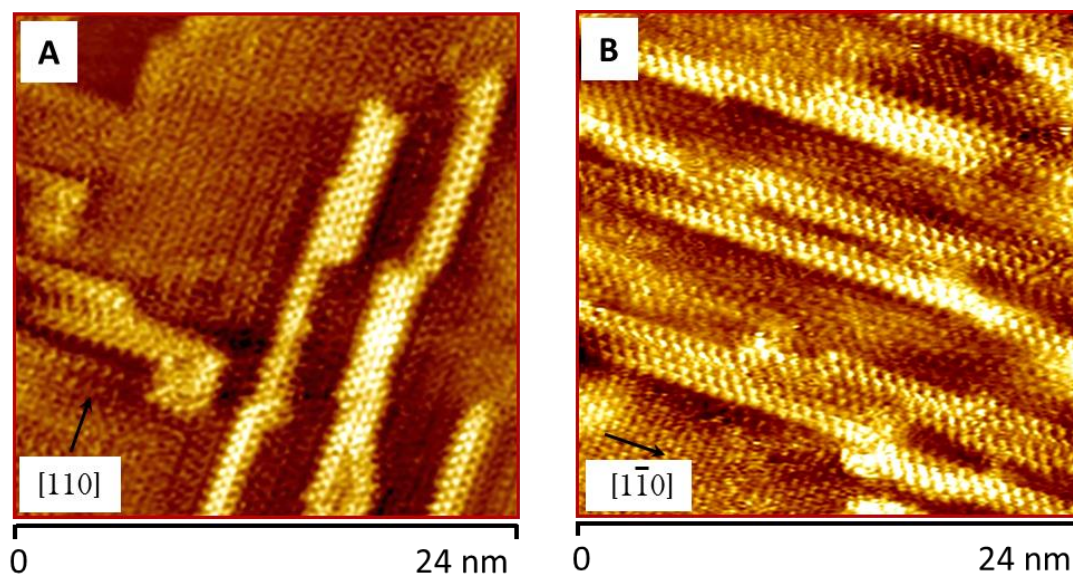

**Figure S5.** *In situ* STM images of L-Cys adlayer on Au(100),  $I_t = 0.06 - 0.20$  nA,  $V_{\text{bias}} = 0.10 - -0.40$  V.  $E_w = -0.25 - -0.15$  V, 200  $\mu\text{M}$  L-Cys in 25 mM  $\text{KH}_2\text{PO}_4$  (pH4.66).

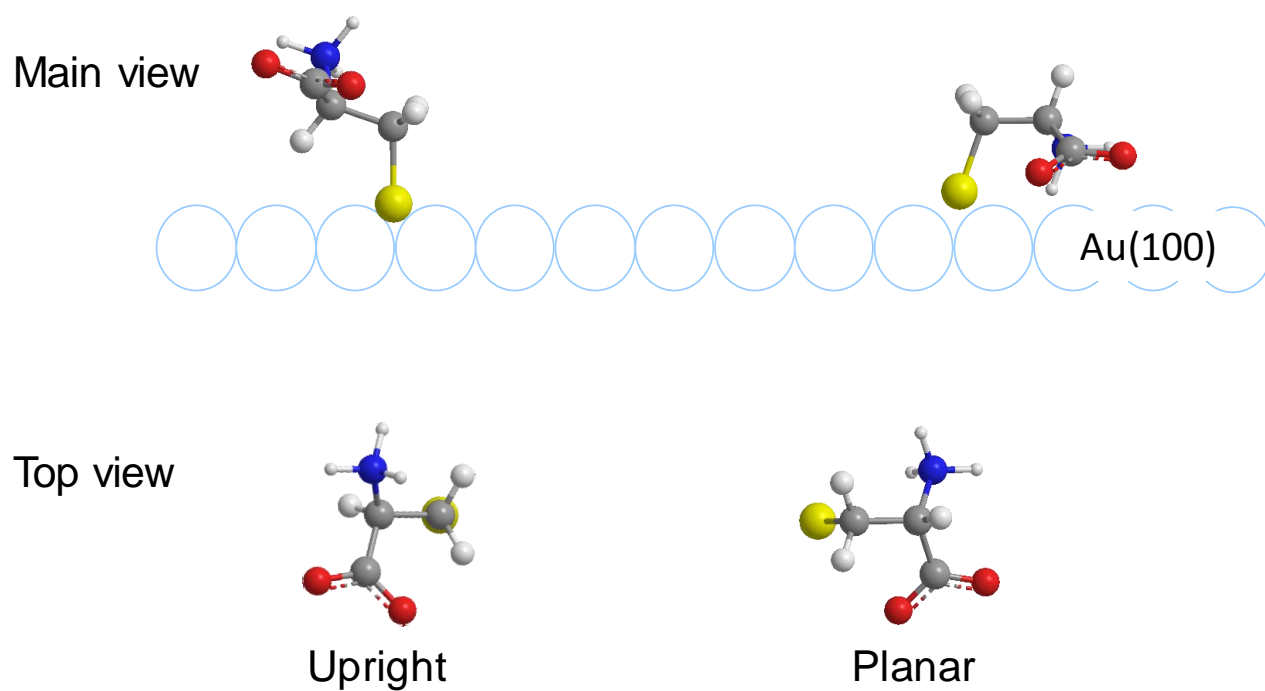

**Figure S6.** Main (upper) and top (bottom) view of planar (right) and upright (left) L-Cys molecules. The same code for Figure 7C.

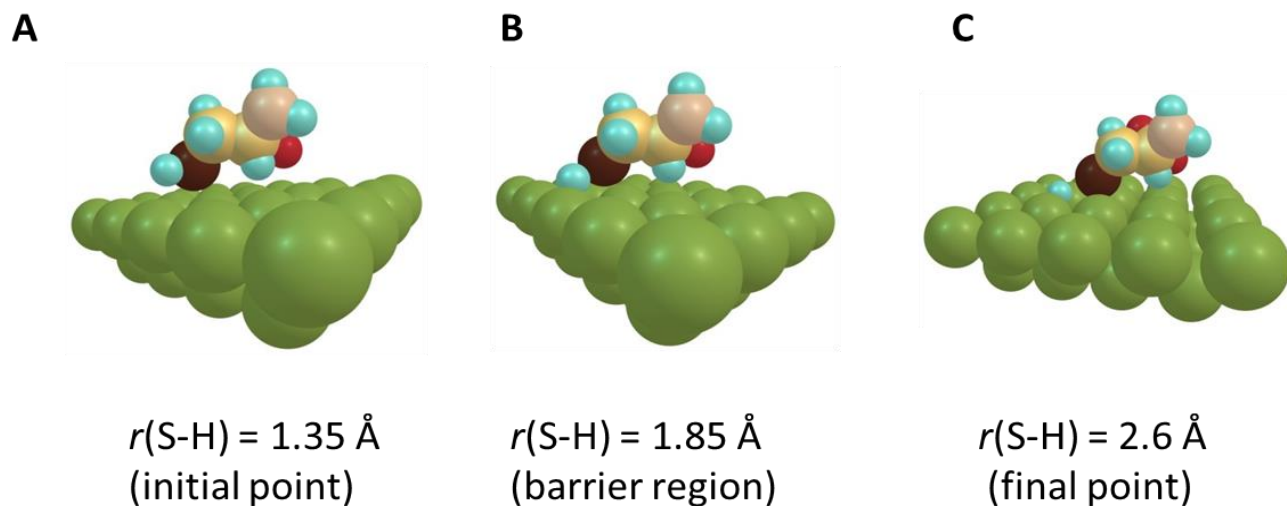

**Figure S7.** Selected structures of a Cys molecule dissociatively adsorbed at the Au(100) surface (with  $-\text{S-H}$  bond cleavage) corresponding to three points at the potential energy surface (see Figure 10A).

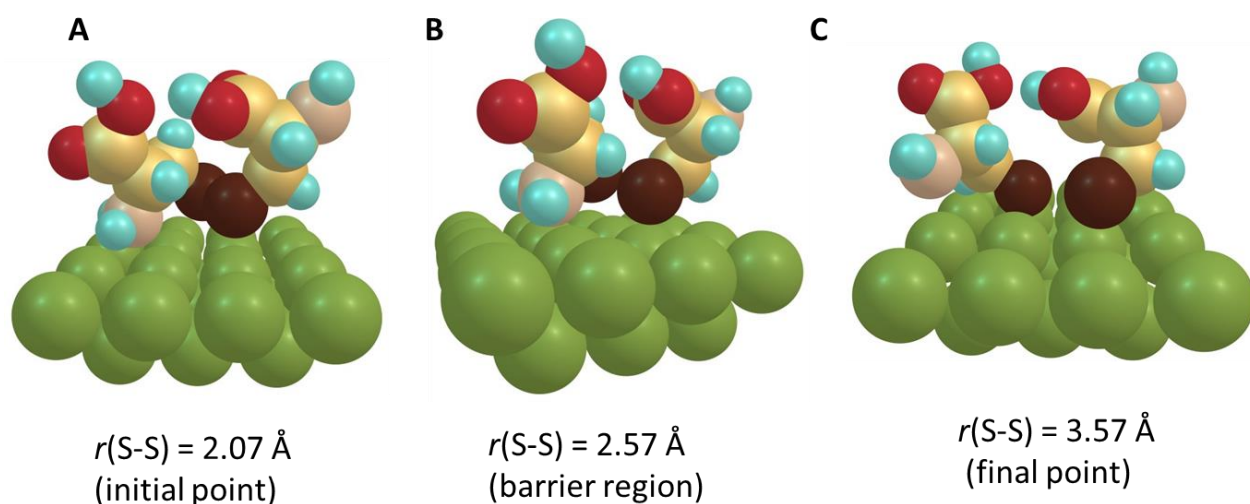

**Figure S8.** Selected structures of a cystine molecule dissociatively adsorbed at the Au(100) surface (accompanied by  $-\text{S-S}-$  bond cleavage) corresponding to three points at the potential energy surface (see Fig. 10B).



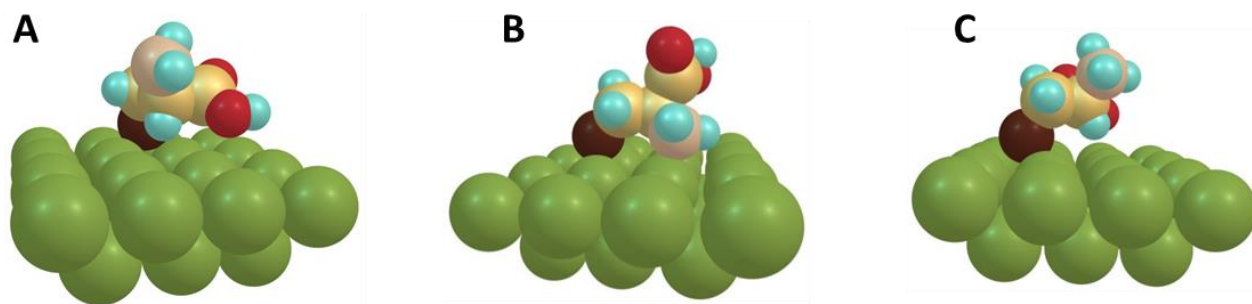

**Figure S9.** Optimized orientations of selected L-Cys radical forms adsorbed at the model Au cluster; (A) R with carboxylic acid group down,  $r(\text{Au-S}) = 2.46 \text{ \AA}$ ,  $r(\text{Au-O}) = 2.89 \text{ \AA}$ ; (B) R with amino group down,  $r(\text{Au-S}) = 2.43 \text{ \AA}$ ,  $r(\text{Au-N}) = 2.31 \text{ \AA}$ ; (C) Zwitterionic  $R_Z$ ,  $r(\text{Au-S}) = 2.47 \text{ \AA}$ .

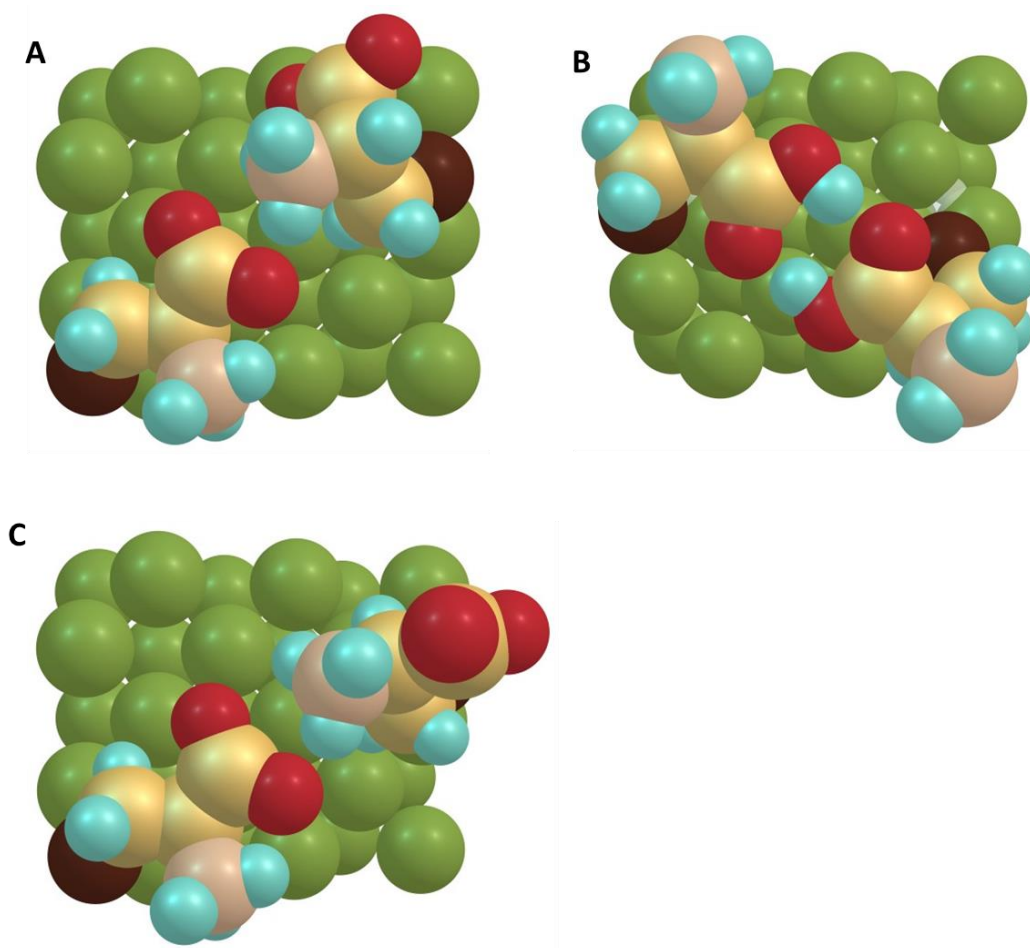

**Figure S10.** Optimized structures of three Cys radical dimers adsorbed at the Au(100) surface in planar (horizontal) orientation; L,L (A); D,D (B); L,D (C). (A)  $r(\text{S-S}) = 7.35 \text{ \AA}$ ; (B)  $r(\text{S-S}) = 8.36 \text{ \AA}$ ; (C)  $r(\text{S-S}) = 9.92 \text{ \AA}$

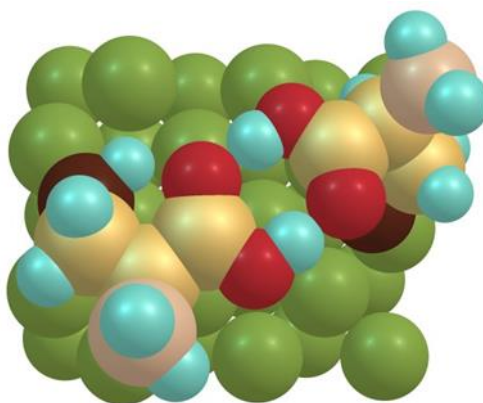

**Figure S11.** Optimized orientation of an L-Cys R-M dimer in planar (horizontal) orientation adsorbed at the Au(100) surface.

**Table S1.** Adsorption energy of some L-Cys forms from aqueous solution at the Au(100) surface.

|                              | Radical<br>Figure S9A | Radical<br>Figure S9B | Radical zwitter ion<br>Figure S9C |
|------------------------------|-----------------------|-----------------------|-----------------------------------|
| $\Delta E_{\text{ads}}$ , eV | -1.2                  | -1.34                 | -0.48                             |

**Table S2.** Formation energy ( $\Delta E_{\text{f}}^{\text{dim}}$ ), the Au-S bond length and S-S distances calculated for three different Cys radical dimers, R-R, adsorbed at the Au(100) surface in planar (horizontal) orientation.

|                                         | L,L<br>Figure S10A | D,D<br>Figure S10B | L,D<br>Figure S10C |
|-----------------------------------------|--------------------|--------------------|--------------------|
| $\Delta E_{\text{f}}^{\text{dim}}$ , eV | -0.65              | -0.99              | -0.89              |
| $r(\text{Au-S})$ , Å                    | 2.47; 2.55         | 2.4; 2.57          | 2.52; 2.58         |
| $r(\text{S-S})$ , Å                     | 7.35               | 8.36               | 9.92               |

**Table S3.** Formation energy ( $\Delta E_{\text{f}}^{\text{dim}}$ ), the Au-S bond length and S-S distances calculated for three different Cys dimers in zwitterionic form,  $\text{R}_Z\text{-R}_Z$ , adsorbed at the Au (100) surface in planar (horizontal) orientation.

|                                         | L,L<br>Figure 11B | D,D<br>Figure 11B | L,D<br>Figure 11C |
|-----------------------------------------|-------------------|-------------------|-------------------|
| $\Delta E_{\text{f}}^{\text{dim}}$ , eV | -3.62             | -2.7              | -3.3              |
| $r(\text{Au-S})$ , Å                    | 2.54; 2.55        | 2.48; 2.52        | 2.52; 2.55        |
| $r(\text{S-S})$ , Å                     | 9.94              | 6.4               | 10.1              |

**Table S4.** Formation energy ( $\Delta E_f^{\text{dim}}$ ), the Au-S bond length and S-S distances calculated for three different Cys dimers<sup>#</sup>, R<sub>Z</sub>-M<sub>Z</sub>, adsorbed at the Au(100) surface in vertical orientation.

|                                | L,L<br>Figure 12B | D,D<br>Figure 12B | L,D<br>Figure 12C |
|--------------------------------|-------------------|-------------------|-------------------|
| $\Delta E_f^{\text{dim}}$ , eV | -1.15             | -1.05             | -1.11             |
| r(Au-S), Å                     | 2.5; 2.52         | 2.39; 2.48        | 2.52; 2.55        |
| r(S-S), Å                      | 7.08              | 8.2               | 9.15              |

<sup>#</sup>R<sub>Z</sub> is adsorbed at the Au(100) surface, while M<sub>Z</sub> is located on top (from the solution side).

**Table S5.** Probabilities used in additional kinetic MC simulations (the meaning of probabilities is illustrated in Fig. S1)<sup>#</sup>.

| Metal surface | P <sub>mr</sub> | P <sub>rz</sub> | P <sub>rr</sub> | P <sub>zz</sub> | P <sub>zv</sub>    | P <sup>*</sup> <sub>zz</sub> | P <sup>*</sup> <sub>zv</sub> |
|---------------|-----------------|-----------------|-----------------|-----------------|--------------------|------------------------------|------------------------------|
| Au(110)       | 0.74            | 0.84            | 0.34            | 0.83            | 4 10 <sup>-2</sup> | 0.91                         | 0.02                         |

<sup>#</sup> P<sup>\*</sup><sub>zz</sub> describes the probability of event, when an array of Cys zwitterionic species adsorbed in planar orientation crosses a strip formed by Cys dimers in vertical orientation and continues its growth.

P<sup>\*</sup><sub>zv</sub> corresponds to the probability of event, when a stripe formed by Cys dimers in vertical orientation crosses an array of Cys zwitter ionic forms in planar orientation and continues its growth.

**Table S6.** Fractions of some species and structures in the Cys SAM on Au(110) estimated for different stages of the monolayer formation based on kinetic MC simulations. (A)  $2.25 \cdot 10^4$  steps, (B)  $9 \cdot 10^4$  steps, (C)  $2.75 \cdot 10^5$  steps, (D)  $2.25 \cdot 10^6$  steps.

| Stages of the SAM formation | M     | R     | R <sub>Z</sub> | R-M   | R <sub>Z</sub> -R <sub>Z</sub> planar arrays | [R <sub>Z</sub> -M <sub>Z</sub> ] <sub>n</sub> vertical rows |
|-----------------------------|-------|-------|----------------|-------|----------------------------------------------|--------------------------------------------------------------|
| (A)                         | 0.4   | 0.48  | 0.             | 0.12  | 0                                            | 0                                                            |
| (B)                         | 0.015 | 0.035 | 0.18           | 0.02  | 0.74                                         | 0.01                                                         |
| (C)                         | 0     | 0.005 | 0.02           | 0.012 | 0.93                                         | 0.033                                                        |
| (D)                         | 0     | 0     | 0.018          | 0     | 0.96                                         | 0.022                                                        |

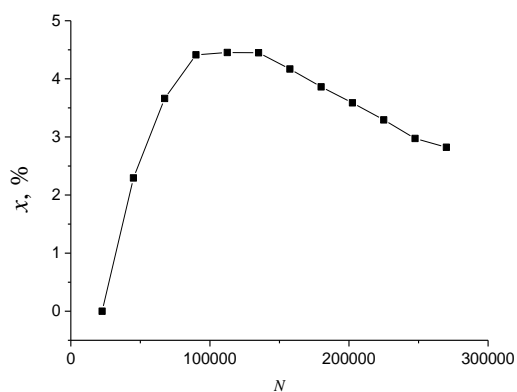

**Figure S12.** Fraction of all “vertical” Cys dimers in the SAM at the Au(110). ( $x$ ) as a function of the number of MC steps ( $N$ ).



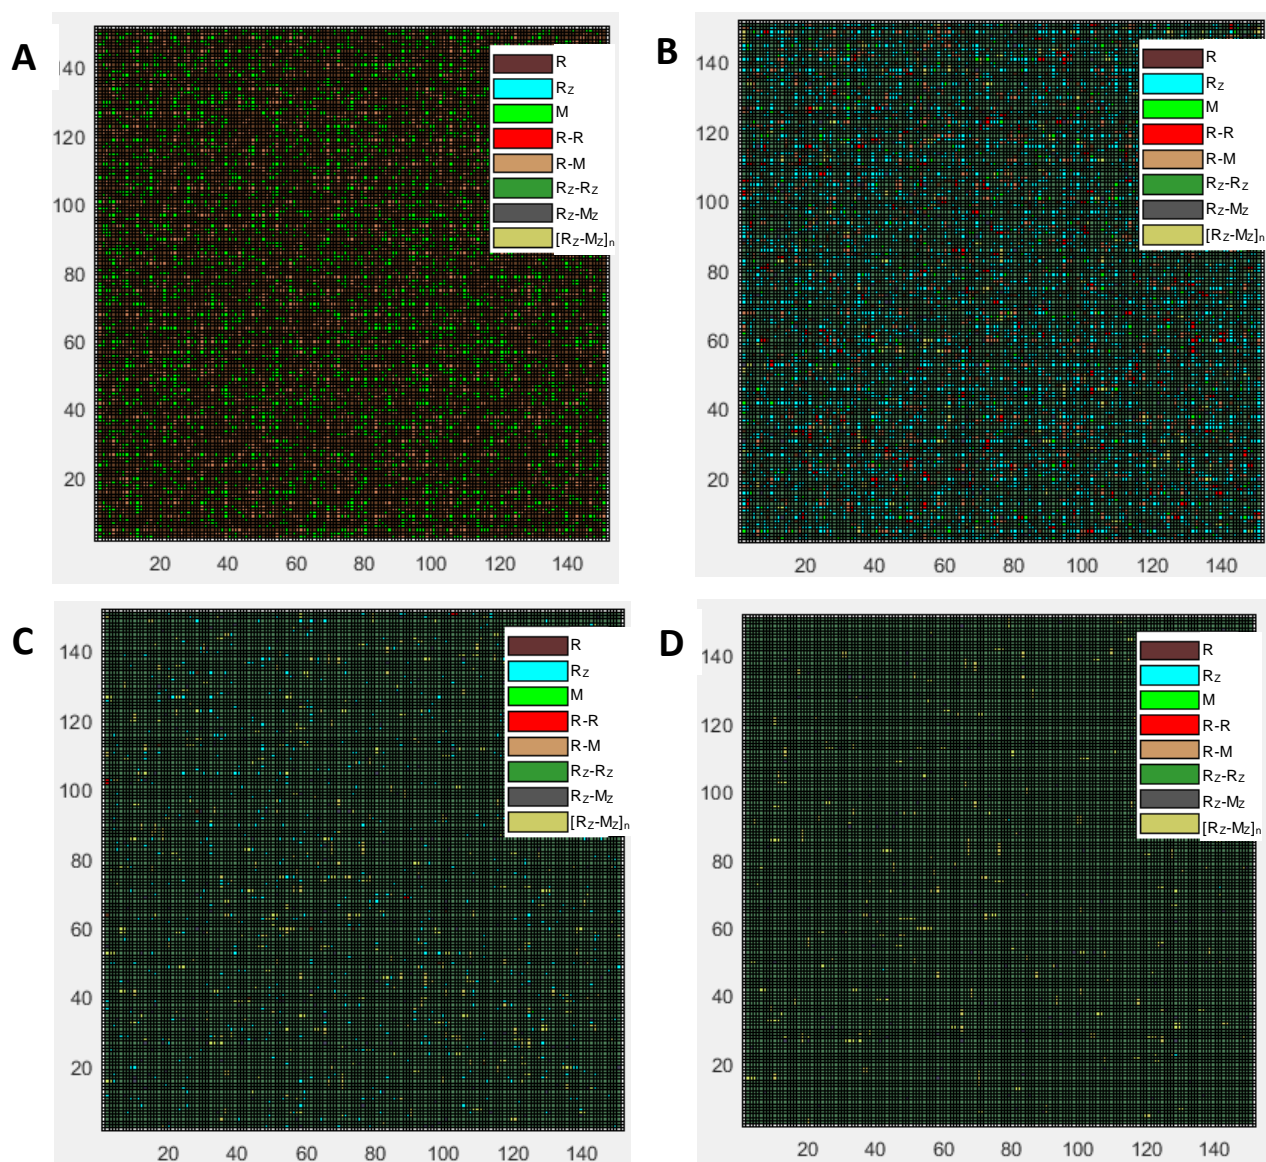

**Figure S13.** 2D-pictures illustrating four different stages of the formation of Cys SAM on Au(110) (see Table S6) built using the data of kinetic MC simulations. M, R,  $R_z$  are Cys molecules, radicals, and radical zwitter ions, respectively. R-R, R-M,  $R_z$ - $R_z$ ,  $R_z$ - $M_z$  are dimer species.  $[R_z-M_z]_n$  indicates rows of vertical dimers.
